# Supplementary material for: Remarkable structure and luminescence regulation of a Gd2LuAl5O12:Ce garnet phosphor with a Ca2+/Si4+ pair for high-quality w-WLED lighting
Source: Royal Society of Chemistry journal article supplement (doi:10.1039/d1dt04183e), 2022-01-01
Supplement: d1dt04183e1.pdf [file d1dt04183e1.pdf]

## Supporting information

### **Remarkable structure and luminescence regulation of Gd<sub>2</sub>LuAl<sub>5</sub>O<sub>12</sub>:Ce garnet phosphor with Ca<sup>2+</sup>/Si<sup>4+</sup> pair for high-quality w-WLED lighting**

Qinghong Meng,<sup>a</sup> Guoying Zhao,<sup>b,c</sup> Qi Zhu,<sup>a</sup> Xudong Sun,<sup>a,d</sup> Ji-Guang Li<sup>c,\*</sup>

<sup>a</sup>*Key Laboratory for Anisotropy and Texture of Materials (Ministry of Education) and School of Materials Science and Engineering, Northeastern University, Shenyang, Liaoning 110819, China*

<sup>b</sup>*School of Materials Science and Engineering, Shanghai Institute of Technology, Shanghai 201418, China*

<sup>c</sup>*Research Center for Functional Materials, National Institute for Materials Science, 1-1 Namiki, Tsukuba, Ibaraki 305-0044, Japan*

<sup>d</sup>*Foshan Graduate school of Northeastern University, Foshan, Guangdong 528311, China*

\*Corresponding author

Dr. Ji-Guang Li

National Institute for Materials Science

Tel: +81-29-860-4394

E-mail: [LI.Jiguang@nims.go.jp](mailto:LI.Jiguang@nims.go.jp)

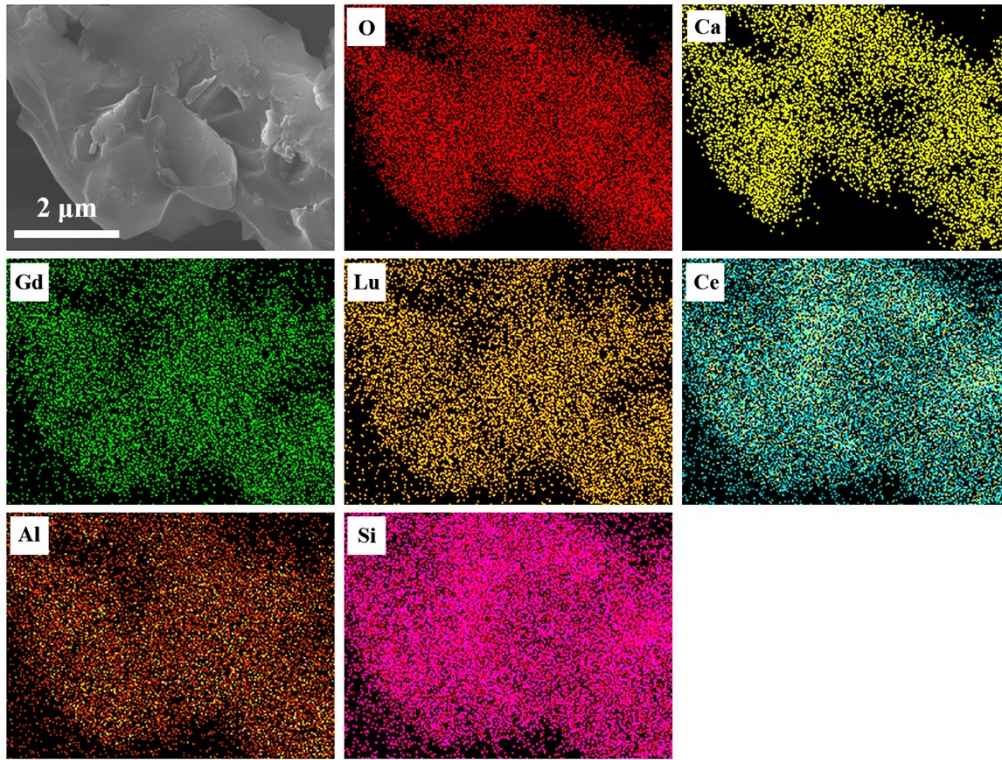

**Fig. S1** The results of EDS mapping for the local area shown by the FE-SEM micrograph of the  $\text{Gd}_{0.77}\text{LuCa}_{1.2}\text{Al}_{3.8}\text{Si}_{1.2}\text{O}_{12}$  ( $x=1.2$ ) garnet phosphor.

**Table S1** Crystallographic data, atomic coordinates ( $x, y, z$ ), atomic occupancy (Occ.) and isotropic displacement parameter ( $\text{\AA}^2$ ) for the typical  $\text{Gd}_{1.97-x}\text{LuCa}_x\text{Al}_{5-x}\text{Si}_x\text{O}_{12}:0.03\text{Ce}$  phosphors of  $x = 0.0, 0.6$  and  $1.2$ .

| $x=0.0$                                                                                      | Atom | Position | $x$       | $y$       | $z$       | Occ.  | $B_{\text{iso}}$ |
|----------------------------------------------------------------------------------------------|------|----------|-----------|-----------|-----------|-------|------------------|
| $\text{Gd}_{1.97}\text{LuAl}_5\text{O}_{12}:0.03\text{Ce}$                                   | Gd   | 24c      | 1/8       | 0         | 1/4       | 0.657 | 0.23(2)          |
| $a=b=c = 12.0484(9) \text{\AA}$                                                              | Lu   | 24c      | 1/8       | 0         | 1/4       | 0.333 | 0.23(2)          |
| $V = 1749.0(4) \text{\AA}^3$                                                                 | Ce   | 24c      | 1/8       | 0         | 1/4       | 0.01  | 0.23(2)          |
| $R_{\text{wp}} = 12.43\%$                                                                    | Al1  | 16a      | 0         | 0         | 0         | 1     | 0.06(9)          |
| $R_{\text{p}} = 8.64\%$                                                                      | Al2  | 24d      | 3/8       | 0         | 1/4       | 1     | 0.14(7)          |
| $\chi^2 = 1.28$                                                                              | O    | 96h      | 0.9697(3) | 0.0476(3) | 0.1497(3) | 1     | 0.17(1)          |
| $x=0.6$                                                                                      |      |          |           |           |           |       |                  |
| $\text{Gd}_{1.37}\text{LuCa}_{0.6}\text{Al}_{4.4}\text{Si}_{0.6}\text{O}_{12}:0.03\text{Ce}$ | Gd   | 24c      | 1/8       | 0         | 1/4       | 0.457 | 0.48(3)          |
| $a=b=c = 12.0102(1) \text{\AA}$                                                              | Lu   | 24c      | 1/8       | 0         | 1/4       | 0.333 | 0.48(3)          |
| $V = 1732.4(4) \text{\AA}^3$                                                                 | Ca   | 24c      | 1/8       | 0         | 1/4       | 0.20  | 0.48(3)          |
| $R_{\text{wp}} = 12.72\%$                                                                    | Ce   | 24c      | 1/8       | 0         | 1/4       | 0.01  | 0.48(3)          |
| $R_{\text{p}} = 9.59\%$                                                                      | Al1  | 16a      | 0         | 0         | 0         | 1     | 0.57(1)          |
| $\chi^2 = 1.58$                                                                              | Al2  | 24d      | 3/8       | 0         | 1/4       | 0.80  | 0.54(8)          |
|                                                                                              | Si   | 24d      | 3/8       | 0         | 1/4       | 0.20  | 0.54(8)          |
|                                                                                              | O    | 96h      | 0.9669(3) | 0.0477(4) | 0.1496(3) | 1     | 0.62(1)          |

$x=1.2$

|                                                                                              |     |     |           |           |           |       |         |
|----------------------------------------------------------------------------------------------|-----|-----|-----------|-----------|-----------|-------|---------|
| $\text{Gd}_{0.77}\text{LuCa}_{1.2}\text{Al}_{3.8}\text{Si}_{1.2}\text{O}_{12}:0.03\text{Ce}$ | Gd  | 24c | 1/8       | 0         | 1/4       | 0.257 | 0.16(2) |
| $a=b=c=11.9754(7)\text{ \AA}$                                                                | Lu  | 24c | 1/8       | 0         | 1/4       | 0.333 | 0.16(2) |
| $V=1717.4(3)\text{ \AA}^3$                                                                   | Ca  | 24c | 1/8       | 0         | 1/4       | 0.40  | 0.16(2) |
| $R_{\text{wp}}=8.92\%$                                                                       | Ce  | 24c | 1/8       | 0         | 1/4       | 0.01  | 0.16(2) |
| $R_{\text{p}}=6.75\%$                                                                        | Al1 | 16a | 0         | 0         | 0         | 1     | 0.63(5) |
| $\chi^2=1.85$                                                                                | Al2 | 24d | 3/8       | 0         | 1/4       | 0.60  | 0.57(4) |
|                                                                                              | Si  | 24d | 3/8       | 0         | 1/4       | 0.40  | 0.57(4) |
|                                                                                              | O   | 96h | 0.9641(2) | 0.0477(2) | 0.1495(2) | 1     | 0.94(7) |

$\chi^2$  was defined as  $R_{\text{wp}}/R_{\text{exp}}$  in the Users' Manual of TOPAS V4.2 software.  $R_{\text{p}}$ ,  $R_{\text{wp}}$  and  $R_{\text{exp}}$  are pattern reliability factor, weighted profile reliability factor and expected reliability factor, respectively.

**Table S2** The  $d_4$ ,  $d_6$ ,  $d_{82}$ ,  $d_{84}$  and  $d_{\text{av}}$  bond distances for the typical  $\text{Gd}_{1.97-x}\text{LuCa}_x\text{Al}_{5-x}\text{Si}_x\text{O}_{12}:0.03\text{Ce}$  phosphors of  $x = 0.0, 0.6$  and  $1.2$ .

|         | $d_4$     | $d_6$     | $d_{82}$  | $d_{84}$  | $d_{\text{av}}$ |
|---------|-----------|-----------|-----------|-----------|-----------------|
| $x=0.0$ | 1.7589(4) | 1.9271(4) | 2.3002(3) | 2.4831(4) | 2.3917          |
| $x=0.6$ | 1.7319(4) | 1.9274(4) | 2.3211(4) | 2.4798(5) | 2.4005          |
| $x=1.2$ | 1.7066(2) | 1.9282(2) | 2.3428(2) | 2.4776(3) | 2.4102          |

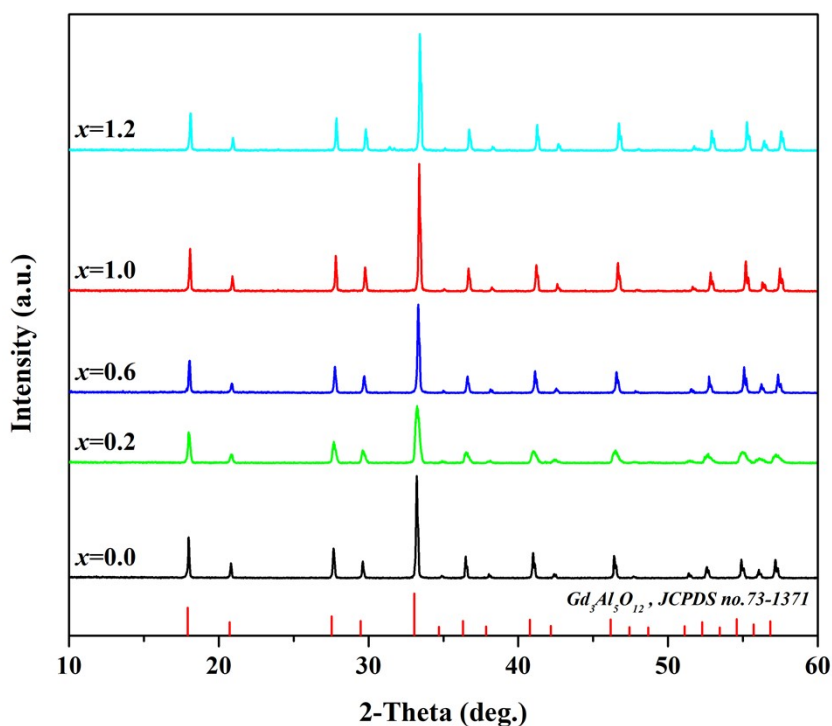

**Fig. S2** XRD patterns of the  $\text{Gd}_{2-x}\text{LuCa}_x\text{Al}_{5-x}\text{Si}_x\text{O}_{12}$  (GLCSAG,  $x = 0.0-1.2$ ) garnet hosts, which revealed that they conform to the GLCSAG:Ce phosphor products shown in Fig. 1, respectively.
